# Supplementary material for: Targeting BMK1 Impairs the Drug Resistance to Combined Inhibition of BRAF and MEK1/2 in Melanoma
Source: PubMed Central journal article supplement (PMC5384194; doi:10.1038/srep46244), 2017-04-07

## **Targeting BMK1 Impairs the Drug Resistance to Combined Inhibition of BRAF and MEK1/2 in Melanoma**

Chengli Song<sup>1</sup>, Lina Wang<sup>1</sup>, Qiang Xu<sup>1</sup>, Kai Wang<sup>1</sup>, Dan Xie<sup>1</sup>, Zhe Yu<sup>1</sup>, Kui Jiang<sup>1</sup>, Lujian Liao<sup>2</sup>, John R. Yates III<sup>3</sup>, Jiing-Dwan Lee<sup>4</sup> & Qingkai Yang<sup>1</sup>

### **Supplementary Figure legends**

**Supplementary Figure S1.** Phosphoproteomic profiling revealed that the upregulated phosphosites were enriched in phospho-tyrosine sites and MAPK pathways. **(a)** Number of gene enriched according to subcellular localizations as noted. **(b)** Percentage of gene enriched according to subcellular localizations as noted. **(c)** Number of gene enriched according to molecular functions. **(d)** Percentage of gene enriched according to molecular functions. **(e)** Number of gene enriched according to biological processes. **(f)** Percentage of gene enriched according to biological processes.

**Supplementary Figure S2.** Phosphorylation of ERK1/2 in CIBM resistant cell lines in Fig. 3c and 3d. Phospho- ERK1/2 was evaluated using western blotting as noted.

**Supplementary Figure S3.** Microarray analysis of A375-P cells treated with/without BMK1 inhibitor, XMD8-92. **(a)** Heatmap of microarray assay data from three individual experiments. A375-P cells were treated with/without 2  $\mu$ M XMD8-92 for 24 hrs. RNA was extracted using the miRNeasy Mini Kit from QIAGEN (QIAGEN, Hilden, Germany) according to the manufacturer's instruction. Microarray experiments were performed in triplicate as noted. And the microarray data are described in Supplementary Table S5. **(b)** Number of gene enriched according to subcellular localization as noted. **(c)** Number of gene enriched according to molecular function. **(d)** Number of gene enriched according to biological process. **(e)** Number of gene enriched according to pathway analysis.

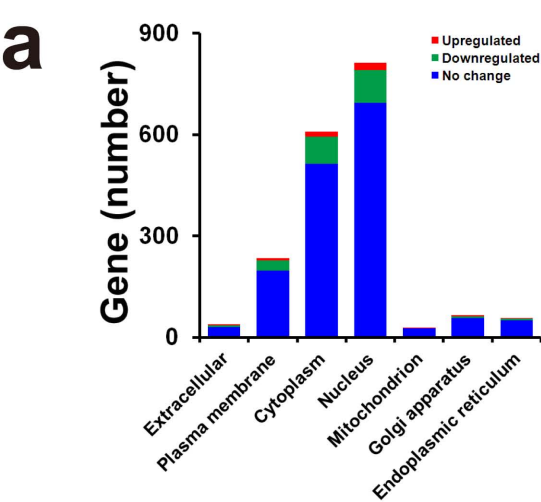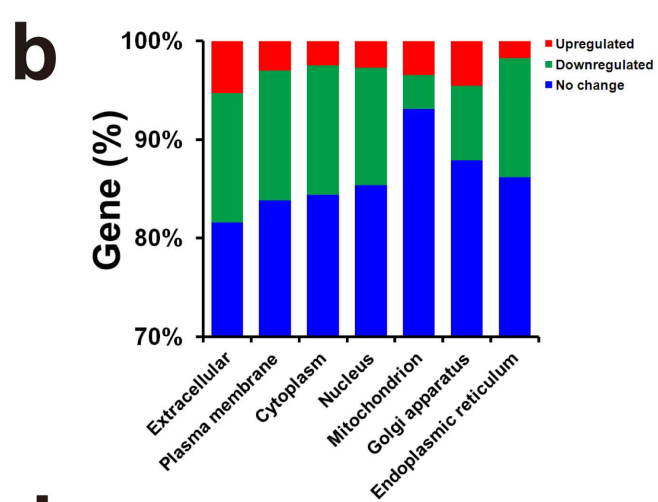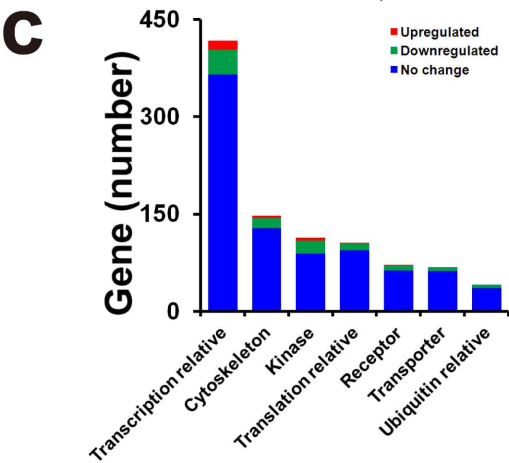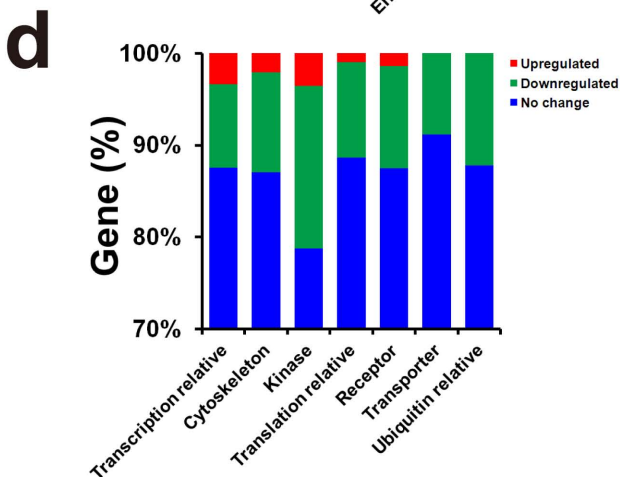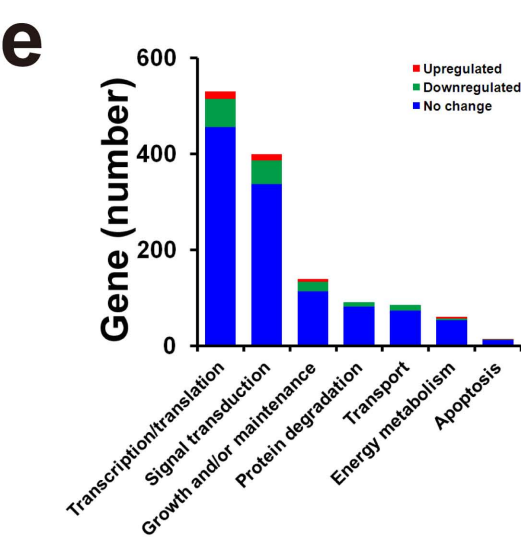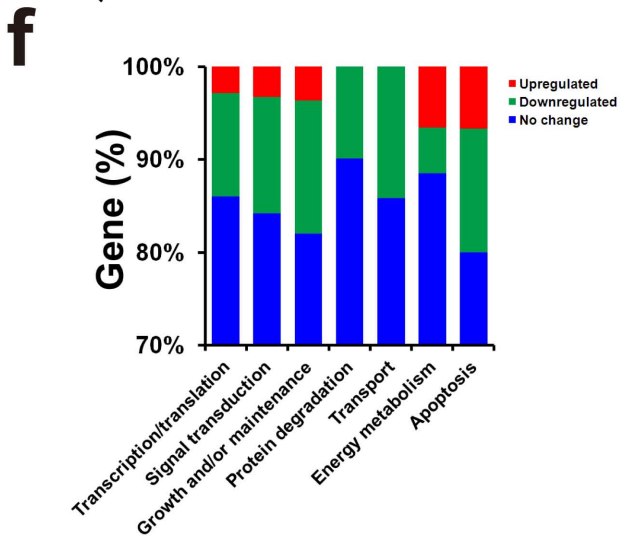

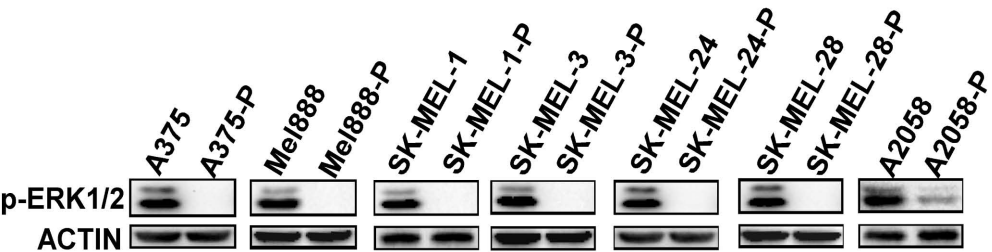

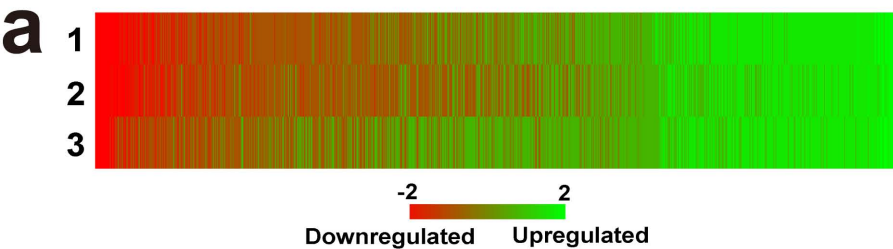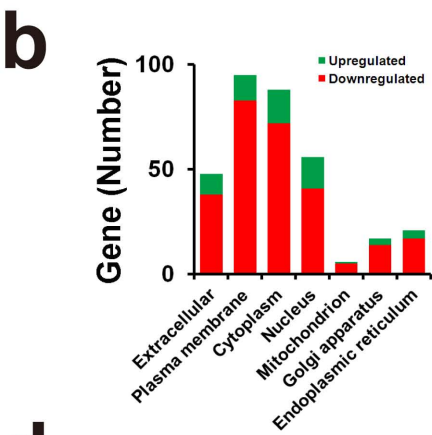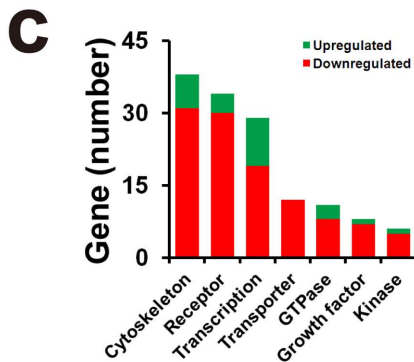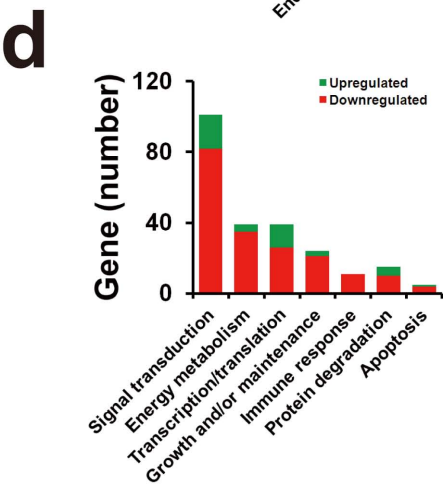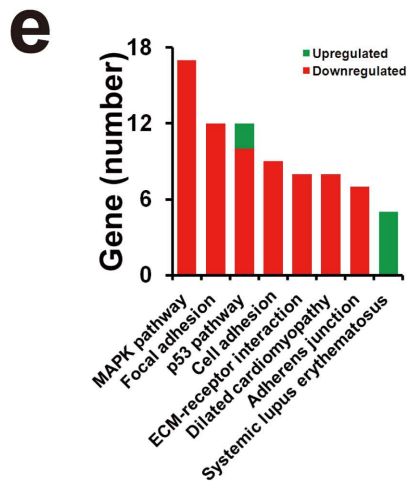

Supplement: srep46244-s1.pdf [file srep46244-s1.pdf]
